# Supplementary material for: Does Pastoral Land-Use Legacy Influence Topsoil Carbon and Nitrogen Accrual Rates in Tallgrass Prairie Restorations?
Source: MDPI journal article supplement (doi:10.3390/land10070735), 2021-07-13
Supplement: s1 [file s1]

# Supplementary Materials: Does Pastoral Land-Use Legacy Influence Topsoil Carbon and Nitrogen Accrual Rates in Tallgrass Prairie Restorations?

Nicholas Glass <sup>1</sup>, Brenda Molano-Flores <sup>2</sup>, Eduardo Dias de Oliveira <sup>1</sup>, Erika Meraz <sup>1</sup>, Samira Umar <sup>1</sup>, Christopher J. Whelan <sup>1,3</sup>, and Miquel A. Gonzalez-Meler <sup>1,\*</sup>

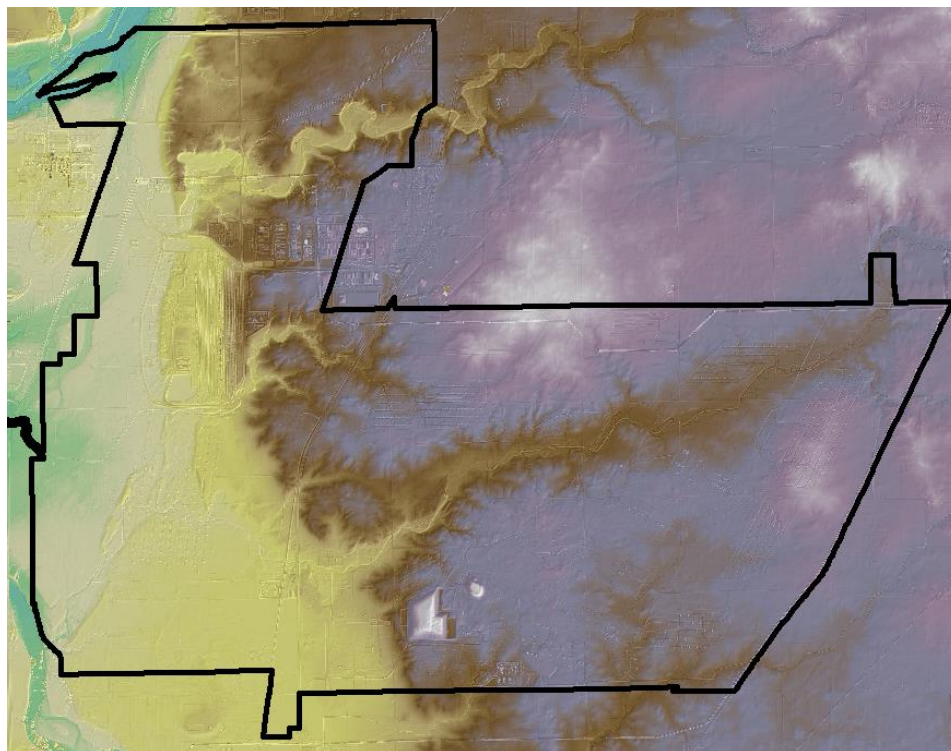

**Figure S1.** Digital elevation model of Midewin National Tallgrass Prairie. Colors that represent elevation are, from lowest to highest elevation: pale blue, pale green, vanilla, yellow, brown, purple, pink, white. Elevation ranges from 153 to 257 meters above sea level.

**Table S1.** Means and S.E.M.s of elevation (m) and water accumulation (WA;  $\log_{10}$ ) for land-use histories and PERMANOVA F-ratio and P-values for effects on soil carbon and nitrogen. Degrees of freedom are 3 (model) and 23 (residual). P is cow pasture, PC is pasture converted from row crop fields, C is row crop fields, REM is remnant prairie, RB is restored bison prairie, ROP is restored old pasture, and RC is restored from row crop fields.

| Land-Use History | Elevation  | WA         | <i>Elevation:WA</i> |
|------------------|------------|------------|---------------------|
|                  |            |            | <i>interaction</i>  |
| P                | 185±6      | 1.45±0.4   | -                   |
| PC               | 204±3      | 0.40±0.3   | -                   |
| C                | 197±5      | 0.65±0.3   | -                   |
| REM              | 172±7      | 0.83±0.3   | -                   |
| RB               | 184±3      | 0.85±0.2   | -                   |
| ROP              | 162±0      | 0.60±0.3   | -                   |
| RC               | 167±2      | 0.91±0.3   | -                   |
| <i>F-ratio</i>   | <i>1.1</i> | <i>0.2</i> | <i>0.4</i>          |
| <i>P-value</i>   | <i>0.3</i> | <i>0.8</i> | <i>0.5</i>          |

**Table S2.** Means and S.E.M.s, ANOVA estimates and 95% confidence intervals of 0–10 cm soil bulk density ( $\text{g cm}^{-3}$ ) in 2008 and 2018 for land-use histories. Degrees of freedom are 6 (model) and 20 (residual). P is cow pasture, PC is pasture converted from row crop fields, C is row crop fields, REM is remnant prairie, RB is restored bison prairie, ROP is restored old pasture, and RC is restored from row crop fields.

| Year | Land-Use History | Mean      | Estimate | 95% CI        |
|------|------------------|-----------|----------|---------------|
| 2008 | RB (Intercept)   | 0.67±0.05 | 0.67     | 0.63 – 0.83   |
|      | P                | 0.66±0.01 | -0.02    | -0.21 – 0.18  |
|      | PC               | 0.82±0.04 | 0.15     | -0.05 – 0.35  |
|      | C                | 0.83±0.03 | 0.15     | -0.05 – 0.35  |
|      | REM              | 0.49±0.04 | -0.18    | -0.36 – -0.01 |
|      | ROP              | 0.43±0.09 | -0.24    | -0.43 – -0.06 |
|      | RC               | 0.73±0.08 | 0.05     | -0.12 – 0.23  |
| 2018 | RB (Intercept)   | 0.79±0.04 | 0.79     | 0.65 – 0.92   |
|      | P                | 0.69±0.11 | -0.1     | -0.31 – 0.11  |
|      | PC               | 0.88±0.07 | 0.09     | -0.12 – 0.30  |
|      | C                | 0.75±0.06 | -0.04    | -0.25 – 0.17  |
|      | REM              | 0.50±0.07 | -0.29    | -0.47 – -0.11 |
|      | ROP              | 0.54±0.05 | -0.25    | -0.44 – -0.06 |
|      | RC               | 0.64±0.05 | -0.15    | -0.33 – 0.03  |

**Table S3.** ANOVA estimates and 95% confidence intervals of root and soil C:N ratios in 2008 and 2018 for land-use histories. Degrees of freedom are 6 (model) and 20 (residual). P is cow pasture, PC is pasture converted from row crop fields, C is row crop fields, REM is remnant prairie, RB is restored bison prairie, ROP is restored old pasture, and RC is restored from row crop fields.

| Year | Land-Use History | Root C:N Estimate | Root C:N 95% CI | Soil C:N Estimate | Soil C:N 95% CI |
|------|------------------|-------------------|-----------------|-------------------|-----------------|
| 2008 | RB (Intercept)   | 41.63             | 33.23 – 50.03   | 11.99             | 11.59 – 12.39   |
|      | P                | 0.01              | -12.82 – 12.84  | -0.61             | -1.22 – 0.01    |
|      | PC               | -0.57             | -13.40 – 12.26  | 0.19              | -0.42 – 0.81    |
|      | C                | -26.68            | -39.51 – -13.86 | -1.38             | -2.00 – -0.77   |
|      | REM              | 11.9              | 0.63 – 23.16    | -0.18             | -0.72 – 0.36    |
|      | ROP              | 10.13             | -1.75 – 22.01   | 0.33              | -0.23 – 0.90    |
|      | RC               | 3.83              | -7.43 – 15.10   | -0.33             | -0.87 – 0.21    |
| 2018 | RB (Intercept)   | 7.06              | 6.16 – 7.95     | 12.35             | 11.35 – 13.35   |
|      | P                | -0.06             | -1.43 – 1.31    | -0.05             | -1.58 – 1.48    |
|      | PC               | -0.74             | -2.11 – 0.63    | -0.25             | -1.78 – 1.28    |
|      | C                | -1.84             | -3.21 – -0.47   | 1.11              | -0.41 – 2.64    |
|      | REM              | -0.91             | -2.11 – 0.30    | 1.05              | -0.3 – 2.39     |
|      | ROP              | -0.39             | -1.65 – 0.88    | -1.05             | -2.47 – 0.37    |
|      | RC               | 0.26              | -0.94 – 1.46    | 0.22              | -1.13 – 1.56    |

**Table S4.** ANOVA estimates and 95% confidence intervals of isotopic mixing model results for C3-derived soil C (0–10 cm) for land-use histories. Degrees of freedom are 6 (model) and 20 (residual). P is cow pasture, PC is pasture converted from row crop fields, C is row crop fields, REM is remnant prairie, RB is restored bison prairie, ROP is restored old pasture, and RC is restored from row crop fields.

| Land-Use History | Estimate | 95% CI        |
|------------------|----------|---------------|
| RB (Intercept)   | 0.77     | 0.69 – 0.85   |
| P                | 0.01     | -0.11 – 0.13  |
| PC               | -0.08    | -0.20 – 0.04  |
| C                | -0.2     | -0.32 – -0.08 |
| REM              | -0.09    | -0.20 – 0.01  |
| ROP              | 0.08     | -0.04 – 0.19  |
| RC               | -0.11    | -0.22 – 0.00  |

**Table S5.** FDR-adjusted P-values for pairwise comparisons of PERMANOVA distance matrix for 0–10 cm soil nutrients Ca, Cu, Mn, Zn, K, P, NO<sub>3</sub>, Mg, Na, and NH<sub>4</sub> for land-use histories. PERMANOVA test F-ratio is 2.1 and P-value is 0.001. Degrees of freedom are 6 (model) and 20 (residual). P is cow pasture, PC is pasture converted from row crop fields, C is row crop fields, REM is remnant prairie, RB is restored bison prairie, ROP is restored old pasture, and RC is restored from row crop fields.

|     | RB   | P    | PC   | RC   | ROP  | REM  |
|-----|------|------|------|------|------|------|
| P   | 0.58 | -    | -    | -    | -    | -    |
| PC  | 0.86 | 0.44 | -    | -    | -    | -    |
| RC  | 0.18 | 0.11 | 0.44 | -    | -    | -    |
| ROP | 0.11 | 0.11 | 0.16 | 0.20 | -    | -    |
| REM | 0.19 | 0.19 | 0.26 | 0.21 | 0.11 | -    |
| C   | 0.11 | 0.19 | 0.26 | 0.32 | 0.11 | 0.19 |

**Table S6.** Means and S.E.M.s of 0–10 cm soil C and N concentrations (g C or N kg<sup>-1</sup>), stocks (kg C or N m<sup>-2</sup>), relative change in C and N concentrations (%), and C and N accrual rates (g C or N m<sup>-2</sup>yr<sup>-1</sup>) for land-use histories. P is cow pasture, PC is pasture converted from row crop fields, C is row crop fields, REM is remnant prairie, RB is restored bison prairie, ROP is restored old pasture, and RC is restored from row crop fields.

| Year | Land-Use History | g C kg <sup>-1</sup> soil | g N kg <sup>-1</sup> soil | kg C m <sup>-2</sup> | kg N m <sup>-2</sup> | Relative Change in g C kg <sup>-1</sup> soil | Relative Change in g N kg <sup>-1</sup> soil | g C m <sup>-2</sup> yr <sup>-1</sup> | g N m <sup>-2</sup> yr <sup>-1</sup> |
|------|------------------|---------------------------|---------------------------|----------------------|----------------------|----------------------------------------------|----------------------------------------------|--------------------------------------|--------------------------------------|
| 2008 | P                | 35±3                      | 3.1±0.2                   | 2.39±0.1             | 0.20±0.01            | -                                            | -                                            | -                                    | -                                    |
|      | PC               | 31±2                      | 2.5±0.1                   | 2.66±0.1             | 0.21±0.01            | -                                            | -                                            | -                                    | -                                    |
|      | C                | 28±2                      | 2.7±0.2                   | 2.33±0.2             | 0.22±0.02            | -                                            | -                                            | -                                    | -                                    |
|      | REM              | 61±11                     | 5.2±1.0                   | 3.10±0.5             | 0.25±0.05            | -                                            | -                                            | -                                    | -                                    |
|      | RB               | 37±3                      | 3.1±0.3                   | 2.55±0.2             | 0.21±0.02            | -                                            | -                                            | -                                    | -                                    |
|      | ROP              | 59±9                      | 4.8±0.8                   | 2.37±0.2             | 0.19±0.02            | -                                            | -                                            | -                                    | -                                    |
|      | RC               | 35±8                      | 3.0±0.7                   | 2.35±0.2             | 0.20±0.02            | -                                            | -                                            | -                                    | -                                    |
| 2018 | P                | 40±6                      | 3.3±0.6                   | 2.70±0.1             | 0.21±0.01            | 5.4±13                                       | 11.5±9                                       | 1.0±1.6                              | 30.5±19                              |
|      | PC               | 31±2                      | 2.7±0.0                   | 2.76±0.1             | 0.23±0.03            | 6.4±6                                        | 1.8±6                                        | 2.3±3.4                              | 9.5±22                               |
|      | C                | 23±1                      | 1.9±0.2                   | 1.70±0.2             | 0.14±0.02            | -28.5±12                                     | -18.1±5                                      | -7.8±2.5                             | -61.1±8                              |
|      | REM              | 61±9                      | 4.6±0.7                   | 2.99±0.3             | 0.22±0.02            | -9.5±7                                       | 3.1±11                                       | -3.4±3.3                             | -10.2±41                             |
|      | RB               | 35±2                      | 2.8±0.1                   | 2.75±0.2             | 0.22±0.01            | -7.8±4                                       | -5.4±4                                       | 1.2±0.4                              | 19.4±5                               |
|      | ROP              | 56±5                      | 4.9±0.4                   | 3.02±0.1             | 0.26±0.01            | 6.3±7                                        | -2.7±7                                       | 7.0±1.6                              | 63.1±22                              |
|      | RC               | 39±7                      | 3.2±0.6                   | 2.53±0.2             | 0.19±0.02            | 9.4±9                                        | 14.4±9                                       | -0.8±1.5                             | 17.3±22                              |

**Table S7.** FDR-adjusted P-values for pairwise comparisons of PERMANOVA distance matrix for 0–10 cm soil C and N concentrations (g C or N kg<sup>−1</sup>) and stocks (kg C or N m<sup>−2</sup>) in 2008 and 2019 for land-use histories. PERMANOVA soil concentration test F-ratio is 2.8 and P-value is 0.03 for 2008, and for 2018 F-ratio is 4.0 and P-value is 0.01. PERMANOVA soil stocks test F-ratio is 0.8 and P-value is 0.6 for 2008, and for 2018 F-ratio is 3.3 and P-value is 0.02. Degrees of freedom are 6 (model) and 20 (residual). P is cow pasture, PC is pasture converted from row crop fields, C is row crop fields, REM is remnant prairie, RB is restored bison prairie, ROP is restored old pasture, and RC is restored from row crop fields.

| g C and N kg <sup>−1</sup> soil |      |      |      |      |      |      |
|---------------------------------|------|------|------|------|------|------|
| 2008                            | RB   | P    | PC   | RC   | ROP  | REM  |
| P                               | 0.86 | -    | -    | -    | -    | -    |
| PC                              | 0.25 | 0.21 | -    | -    | -    | -    |
| RC                              | 0.96 | 0.96 | 0.86 | -    | -    | -    |
| ROP                             | 0.21 | 0.21 | 0.21 | 0.21 | -    | -    |
| REM                             | 0.22 | 0.25 | 0.21 | 0.21 | 0.86 | -    |
| C                               | 0.26 | 0.21 | 0.7  | 0.86 | 0.21 | 0.21 |
| 2018                            | RB   | P    | PC   | RC   | ROP  | REM  |
| P                               | 0.68 | -    | -    | -    | -    | -    |
| PC                              | 0.42 | 0.31 | -    | -    | -    | -    |
| RC                              | 0.75 | 0.98 | 0.65 | -    | -    | -    |
| ROP                             | 0.17 | 0.23 | 0.17 | 0.22 | -    | -    |
| REM                             | 0.22 | 0.31 | 0.22 | 0.23 | 0.75 | -    |
| C                               | 0.17 | 0.22 | 0.22 | 0.31 | 0.17 | 0.18 |
| kg C and N m <sup>−2</sup>      |      |      |      |      |      |      |
| 2008                            | RB   | P    | PC   | RC   | ROP  | REM  |
| P                               | 0.78 | -    | -    | -    | -    | -    |
| PC                              | 0.81 | 0.78 | -    | -    | -    | -    |
| RC                              | 0.78 | 0.95 | 0.78 | -    | -    | -    |
| ROP                             | 0.78 | 0.78 | 0.78 | 0.81 | -    | -    |
| REM                             | 0.78 | 0.78 | 0.78 | 0.78 | 0.78 | -    |
| C                               | 0.78 | 0.78 | 0.78 | 0.78 | 0.78 | 0.78 |
| 2018                            | RB   | P    | PC   | RC   | ROP  | REM  |
| P                               | 0.91 | -    | -    | -    | -    | -    |
| PC                              | 0.79 | 0.77 | -    | -    | -    | -    |
| RC                              | 0.68 | 0.73 | 0.6  | -    | -    | -    |
| ROP                             | 0.33 | 0.26 | 0.6  | 0.26 | -    | -    |
| REM                             | 0.73 | 0.73 | 0.73 | 0.6  | 0.61 | -    |

C                      0.26   0.26   0.26   0.26   0.26   0.26

**Table S8.** ANOVA estimates and 95% confidence intervals for 0–10 cm soil C and N concentrations (g C or N kg<sup>-1</sup>) and stocks (kg C or N m<sup>-2</sup>) in 2008 and 2018 for land-use histories. Degrees of freedom are 6 (model) and 20 (residual). P is cow pasture, PC is pasture converted from row crop fields, C is row crop fields, REM is remnant prairie, RB is restored bison prairie, ROP is restored old pasture, and RC is restored from row crop fields.

| Year | Response Variable | Land-Use History | Concentration Estimate | Concentration 95% CI | Stock Estimate | Stock 95% CI  |
|------|-------------------|------------------|------------------------|----------------------|----------------|---------------|
| 2008 | Carbon            | RB (Intercept)   | 37                     | 28 – 52              | 1.59           | 1.39 – 1.80   |
|      |                   | P                | -2                     | -20 – 17             | -0.05          | -0.36 – 0.26  |
|      |                   | PC               | -6                     | -23 – 11             | 0.04           | -0.28 – 0.35  |
|      |                   | C                | -9                     | -26 – 8              | -0.07          | -0.38 – 0.24  |
|      |                   | REM              | 24                     | 4 – 47               | 0.14           | -0.14 – 0.41  |
|      |                   | ROP              | 22                     | 1 – 47               | -0.06          | -0.35 – 0.23  |
|      |                   | RC               | -2                     | -18 – 14             | -0.07          | -0.34 – 0.20  |
|      | Nitrogen          | RB (Intercept)   | 3.1                    | 2.3 – 4.4            | 0.45           | 0.39 – 0.51   |
|      |                   | P                | 0.0                    | -1.6 – 1.7           | 0.00           | -0.10 – 0.09  |
|      |                   | PC               | -0.6                   | -2.0 – 0.9           | 0.01           | -0.09 – 0.10  |
|      |                   | C                | -0.4                   | -1.9 – 1.1           | 0.02           | -0.08 – 0.11  |
|      |                   | REM              | 2.1                    | 0.4 – 4.2            | 0.04           | -0.04 – 0.12  |
|      |                   | ROP              | 1.7                    | -0.1 – 3.8           | -0.02          | -0.11 – 0.06  |
|      |                   | RC               | -0.1                   | -1.5 – 1.3           | -0.01          | -0.09 – 0.07  |
| 2018 | Carbon            | RB (Intercept)   | 35                     | 27 – 46              | 2.75           | 2.31 – 3.19   |
|      |                   | P                | 5                      | -11 – 22             | -0.05          | -0.72 – 0.63  |
|      |                   | PC               | -3                     | -17 – 11             | 0.01           | -0.66 – 0.69  |
|      |                   | C                | -12                    | -25 – 0.0            | -1.05          | -1.72 – -0.37 |
|      |                   | REM              | 26                     | 9.0 – 45             | 0.25           | -0.35 – 0.84  |
|      |                   | ROP              | 21                     | 4.0 – 41             | 0.27           | -0.34 – 0.88  |
|      |                   | RC               | 4                      | -10 – 18             | -0.22          | -0.81 – 0.37  |
|      | Nitrogen          | RB (Intercept)   | 2.8                    | 2.2 – 3.8            | 0.22           | 0.17 – 0.26   |
|      |                   | P                | 0.4                    | -0.8 – 1.9           | 0.00           | -0.07 – 0.06  |
|      |                   | PC               | -0.2                   | -1.3 – 1.1           | 0.02           | -0.05 – 0.08  |
|      |                   | C                | -1.0                   | -2.0 – 0.0           | -0.08          | -0.14 – -0.01 |
|      |                   | REM              | 1.7                    | 0.4 – 3.2            | 0.00           | -0.06 – 0.06  |
|      |                   | ROP              | 2.1                    | 0.6 – 3.9            | 0.04           | -0.02 – 0.10  |

---

|    |     |            |       |              |
|----|-----|------------|-------|--------------|
| RC | 0.4 | -0.8 – 1.5 | -0.03 | -0.08 – 0.03 |
|----|-----|------------|-------|--------------|

---

**Table S9.** FDR-adjusted P-values for pairwise comparisons of PERMANOVA distance matrix for relative change in 0–10 cm soil C and N concentrations and C and N accrual rates for land-use histories. PERMANOVA relative change test F-ratio is 1.9 and P-value is 0.1. PERMANOVA accrual rate test F-ratio is 2.6 and P-value is 0.5. Degrees of freedom are 6 (model) and 20 (residual). P is cow pasture, PC is pasture converted from row crop fields, C is row crop fields, REM is remnant prairie, RB is restored bison prairie, ROP is restored old pasture, and RC is restored from row crop fields.

| Relative Change in g C and N kg <sup>-1</sup> soil |      |      |      |      |      |      |
|----------------------------------------------------|------|------|------|------|------|------|
|                                                    | RB   | P    | PC   | RC   | ROP  | REM  |
| P                                                  | 0.56 | -    | -    | -    | -    | -    |
| PC                                                 | 0.56 | 0.9  | -    | -    | -    | -    |
| RC                                                 | 0.49 | 0.83 | 0.67 | -    | -    | -    |
| ROP                                                | 0.56 | 0.65 | 0.9  | 0.56 | -    | -    |
| REM                                                | 0.75 | 0.65 | 0.67 | 0.56 | 0.61 | -    |
| C                                                  | 0.49 | 0.49 | 0.49 | 0.49 | 0.49 | 0.49 |
| g C and N m <sup>-2</sup> yr <sup>-1</sup>         |      |      |      |      |      |      |
|                                                    | RB   | P    | PC   | RC   | ROP  | REM  |
| P                                                  | 0.79 | -    | -    | -    | -    | -    |
| PC                                                 | 0.77 | 0.77 | -    | -    | -    | -    |
| RC                                                 | 0.77 | 0.77 | 0.74 | -    | -    | -    |
| ROP                                                | 0.31 | 0.38 | 0.43 | 0.31 | -    | -    |
| REM                                                | 0.66 | 0.66 | 0.67 | 0.67 | 0.31 | -    |
| C                                                  | 0.31 | 0.31 | 0.43 | 0.31 | 0.31 | 0.66 |
